# Supplementary material for: Fusion of microlitre water-in-oil droplets for simple, fast and green chemical assays
Source: Royal Society of Chemistry journal article supplement (doi:10.1039/c5an00847f), 2015-01-01
Supplement: c5an00847f1.pdf [file c5an00847f1.pdf]

**ELECTRONIC SUPPLEMENTARY INFORMATION (E.S.I.)**

**Fusion of Microlitre Water-in-Oil Droplets  
for Simple, Fast and Green Chemical Assays**

Shih-Hao Chiu,<sup>a</sup> Pawel L. Urban<sup>a,b\*</sup>

<sup>a</sup> Department of Applied Chemistry, National Chiao Tung University

1001 University Rd, Hsinchu, 300, Taiwan

<sup>b</sup> Institute of Molecular Science, National Chiao Tung University

1001 University Rd, Hsinchu, 300, Taiwan

\* Corresponding author: Prof. P.L. Urban

Fax +886-3-5723764

E-mail: plurban@nctu.edu.tw

**Table S1.** Intensities and wavelengths of different LED sources used in this study for colorimetric and fluorimetric detection. The intensities were measured above the Petri dish (*cf.* **Figure 1**). See **Figure S2** for full spectra.

| Type          | Intensity / lux | $\lambda_{\text{max}}$ / nm | Corresponding data                        |
|---------------|-----------------|-----------------------------|-------------------------------------------|
| Ultraviolet   | 41              | 397                         | Figs. S5A and S5B                         |
| Blue          | 1100            | 465                         | Figs. S5A and S5B                         |
| Green         | 480             | 525                         | Figs. S5A and S5B                         |
| Yellow        | 4               | 586                         | Fig. S5A                                  |
| Orange        | 27              | 593                         | Figs. S5A and S5B                         |
| Bright red    | 500             | 633                         | Figs. S5A, S5B and S6                     |
| Red           | 2               | 691                         | Fig. S5A                                  |
| White (array) | 4000            | 448, 538                    | Figs. 2A, 3, S1, S2, S3A, and S4; Movie 1 |
| Blue (array)  | 1660            | 475                         | Figs. 2B and S3B; Movie 2                 |

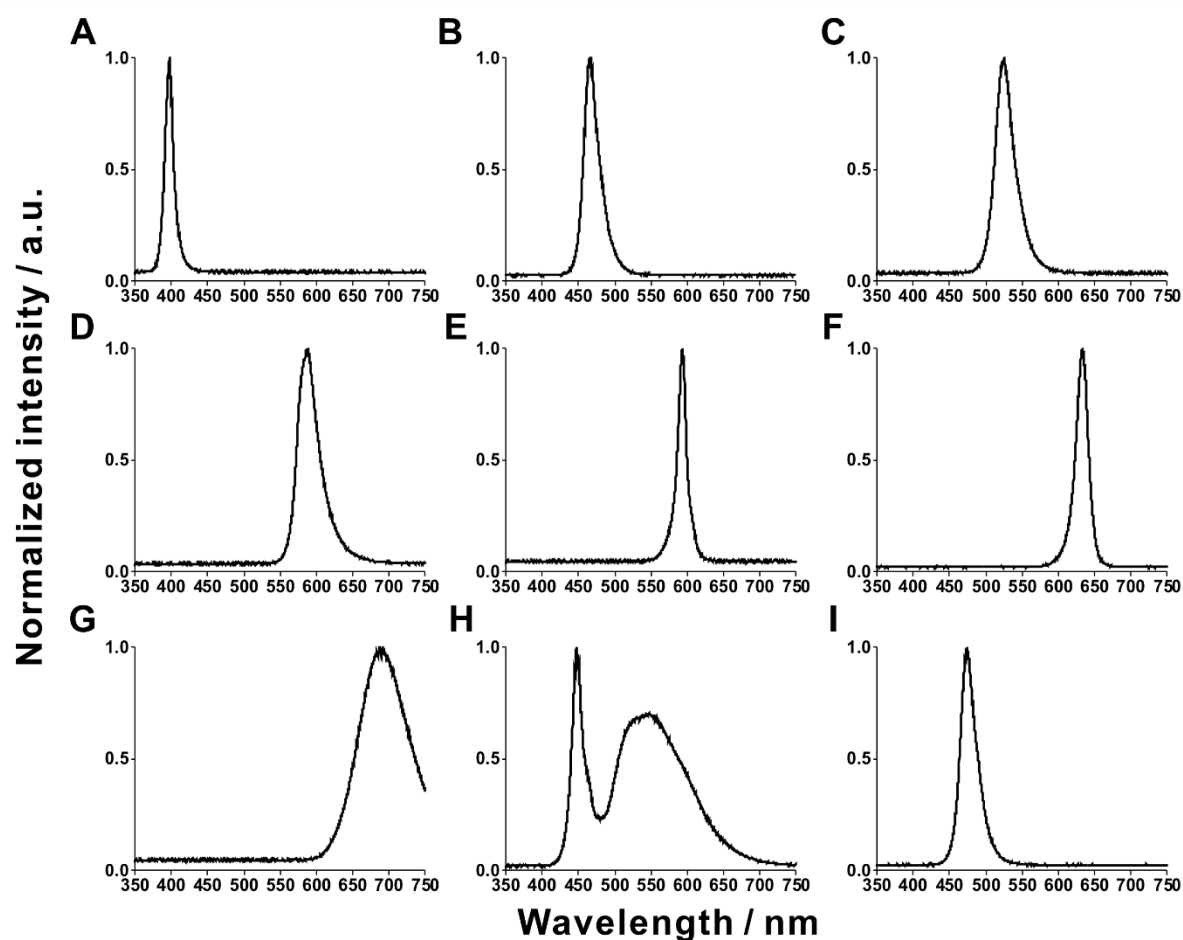

**Figure S1.** Spectral characteristics of the light sources used in this study: (A-G) Home-made LED light source (14 LEDs; 2 for each of 7 wavelengths). (H) White LED array (48). (I) Blue LED array (19). Emission maxima: (A) ultraviolet; (B) blue; (C) green; (D) yellow; (E) orange; (F) bright red; (G) red; (H) white; (I) blue. The measurement of wavelength was conducted using a portable spectrophotometer (USB4000-VIS-NIR; Ocean Optics, Dunedin, FL, USA).

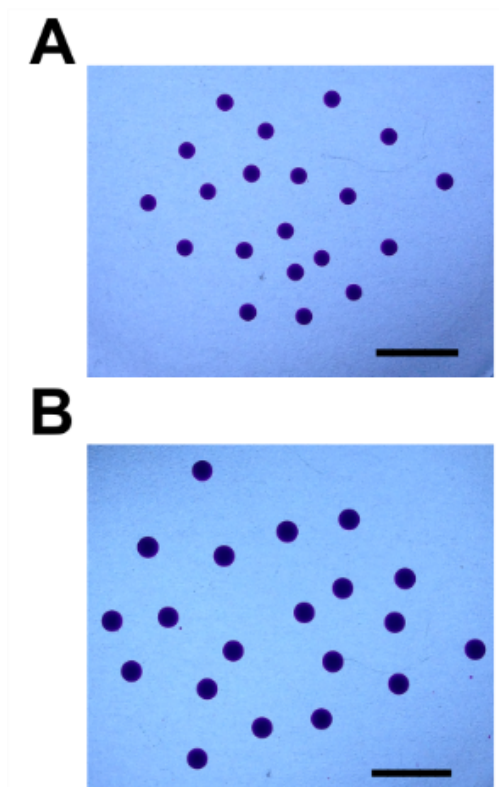

**Figure S2.** Droplet pipetting – repeatability test. In this experiment, 20 individual droplets ((A) 0.7  $\mu\text{L}$ , (B) 1.4  $\mu\text{L}$ ), containing 1-M aqueous solution of potassium permanganate, were dispensed into the silicone oil matrix. Scale bar: 5 mm.

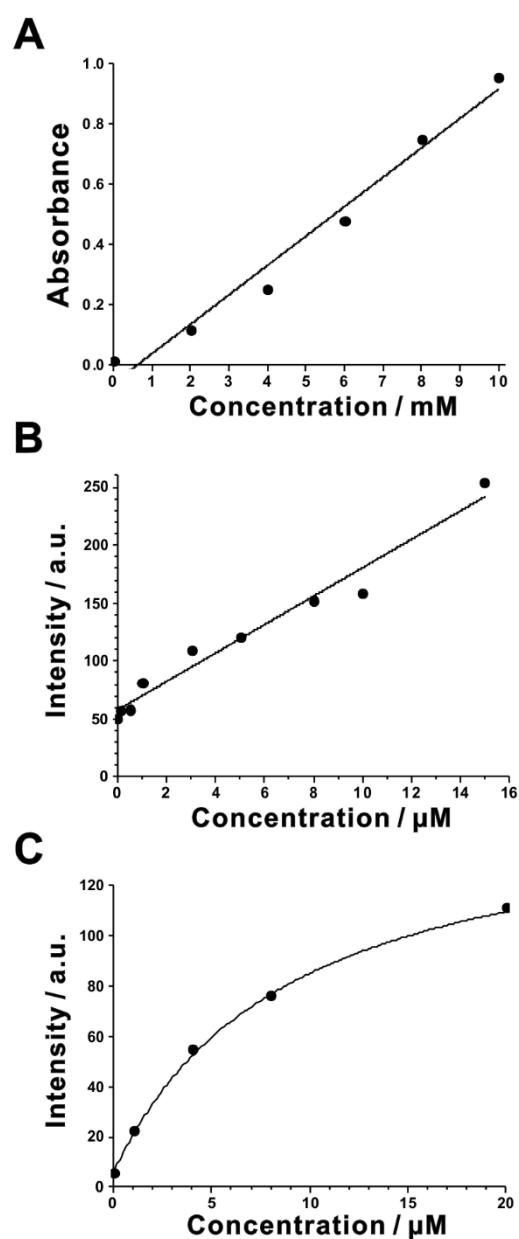

**Figure S3.** Calibration plots for quantitative analysis of droplet contents using (A) colorimetry (*cf.* **Figure 1B(i)**); (B) fluorimetry (*cf.* **Figure 1B(ii)**); (C) chemiluminescence (*cf.* **Figure 1B(iii)**). In (A), the standard volume was  $\sim 1.4 \mu\text{L}$ , while in (B) and (C), the standard volumes were  $\sim 5 \mu\text{L}$ . Every data point in (A) is obtained from average of  $\sim 30$  pixels while in (B) and (C)  $\sim 65$  pixels. Calibration equations: (A)  $Absorbance = (0.108 \pm 0.007) C - (0.138 \pm 0.043)$ ; (B)  $Intensity = (12.3 \pm 0.8) C + (57.8 \pm 5.6)$ ; (C)  $Intensity = 5.8 + ((151 \pm 5) \times C) / (C + (0.009 \pm 0.001))$ . Concentration ranges used in the fits: (A) 0-100 mM potassium permanganate; (B) 0-15  $\mu\text{M}$  fluorescein; (C) 0-20 mM sodium hypochlorite. LOD in colorimetry is 1.19 mM ( $\sim 1.4 \text{ nmol}$ ), LOD in fluorimetry is 1.37  $\mu\text{M}$  ( $\sim 1.4 \text{ pmol}$ ), LOD in chemiluminescence is 112 nM ( $\sim 580 \text{ fmol}$ ). The data presented in (C) has been obtained in the experiment illustrated in **Figure 2C**.

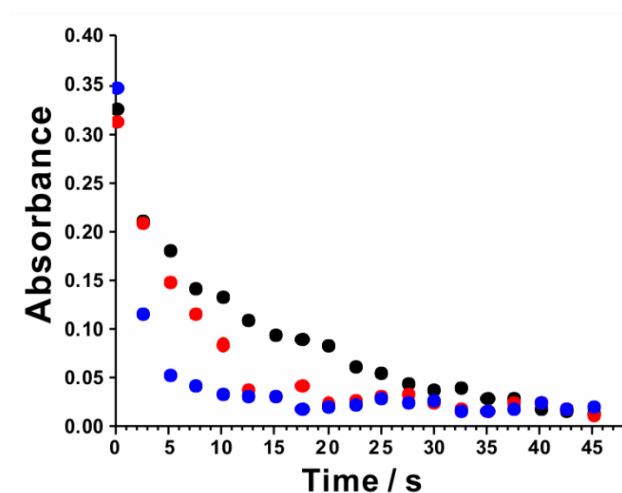

**Figure S4.** Comparison of silicone oil (●, black), soybean oil (●, red), and 1-octanol (●, blue) as assay matrix. Volume of every merged droplet was  $\sim 1.4 \mu\text{L}$ . The concentration of the initial droplets were: (i) 10 mM potassium permanganate; (ii) 222 mM glucose mixed with 167 mM sodium hydroxide (*cf.* **Figure 2A**). The data for silicone oil comes from a replicate of the experiment illustrated in **Figure 2A**.

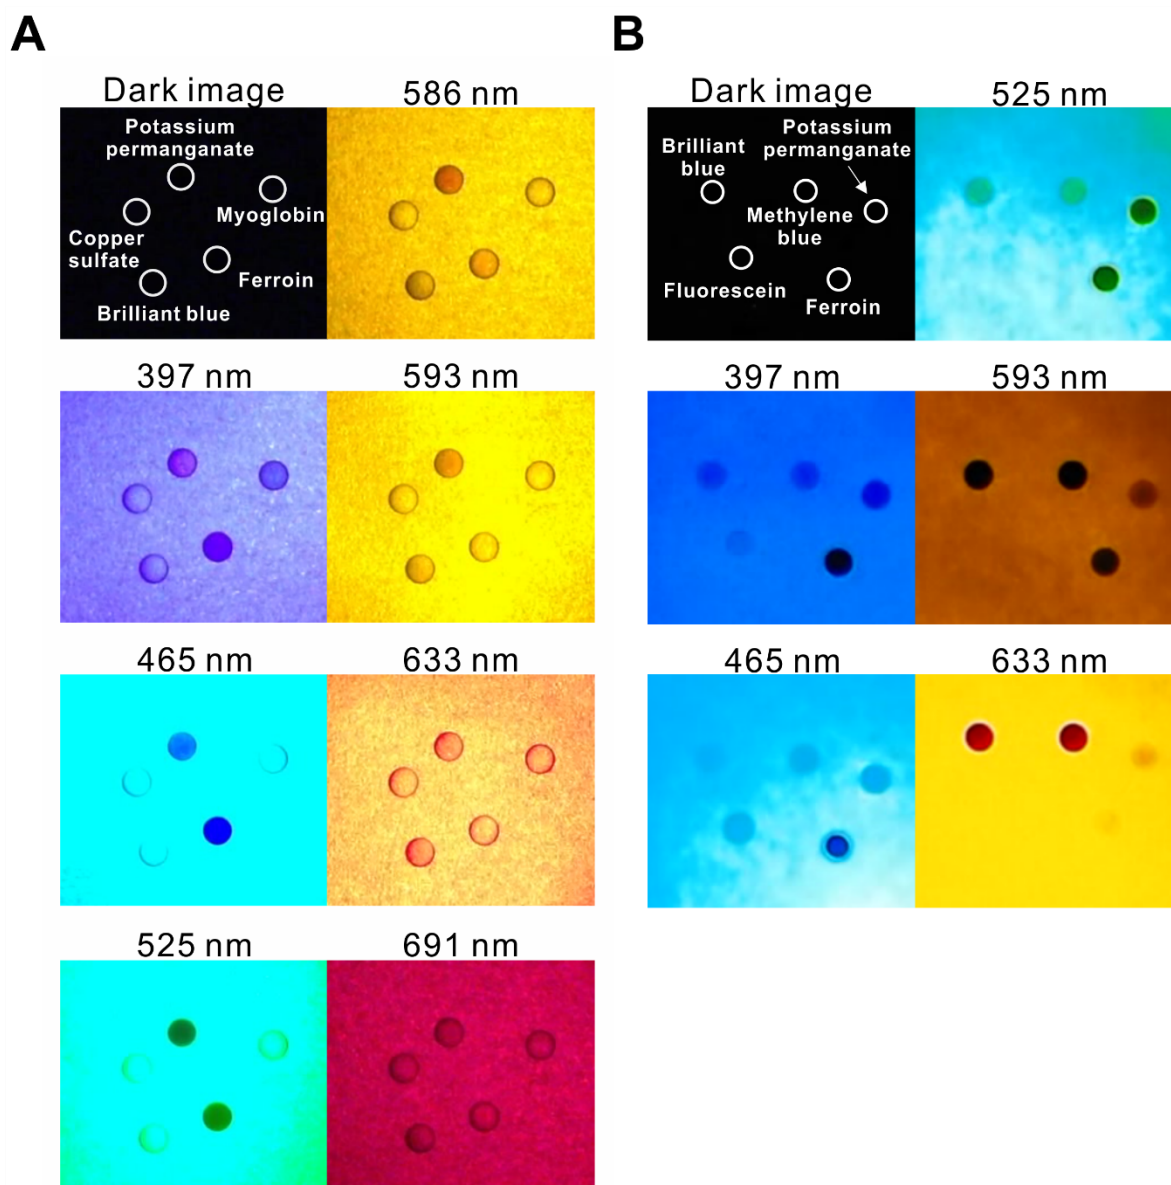

**Figure S5.** Possibility to carry out spectral analysis of multiple microdroplets in oil matrix. Volume of every droplet:  $\sim 1.4 \mu\text{L}$ . The Petri dish containing droplet suspension in silicone oil was illuminated using the home-made multi-wavelength LED source controlled by computer. Video sequences were recorded either by smartphone camera (A), or a professional reflex camera (B). The wavelength presentation time in (A) was either 4 nor 6 s (depending on wavelength), while the wavelength presentation time in (B) was fixed to 0.5 s. The droplets in (A) contain: 1 mM brilliant blue, 1 M copper sulphate, 25 mM ferroin, 0.1 mM myoglobin, and 1 mM potassium permanganate. The droplets in (B) contain: 1 mM brilliant blue, 25 mM ferroin, 6.92 mM fluorescein, 1 mM methylene blue, and 10 mM potassium permanganate.

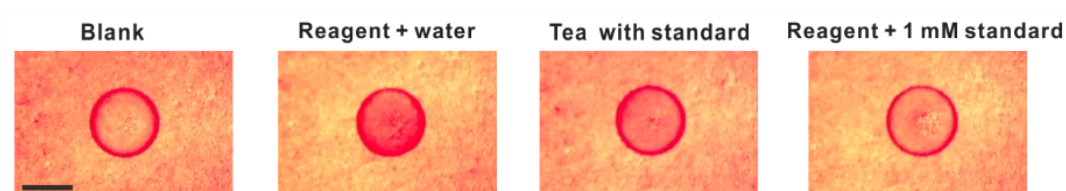

**Figure S6.** Semi-quantitative measurement of ascorbic acid. The images show the merged droplets 15 s after the merger. The blank was 5- $\mu$ L 200 mM ammonium acetate droplet merged with 5- $\mu$ L water droplet. The assay droplets originate from merging 5- $\mu$ L Tillman's reagent (1 mM 2,6-dichloroindophenol sodium salt hydrate in aqueous 200 mM ammonium acetate) droplets with 5- $\mu$ L sample droplets: water; 10 $\times$  diluted mixture of oolong tea with ascorbic acid (final concentration of ascorbic acid, 0.5 mM); 1.0 mM ascorbic acid in water. The Petri dish was illuminated with red light source ( $\lambda = 633$  nm; cf. **Figure S5A**). Scale bar: 2 mm.
